# Supplementary material
Source: Springer Nature journal article supplement (https://www.springermedizin.de/resource/supplementary/12876_2010_643_MOESM3_ESM.pdf/9437140)

### Age of PCP

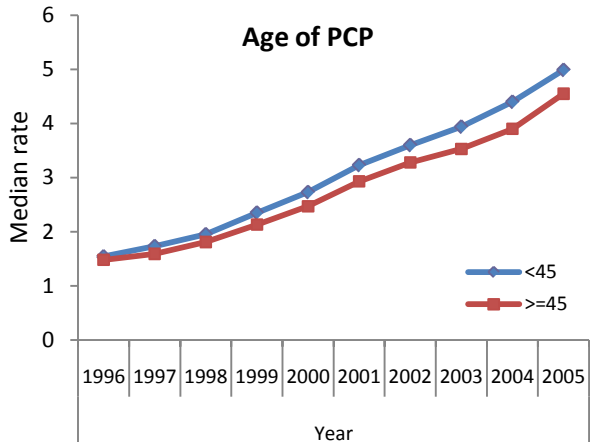

### Sex of PCP

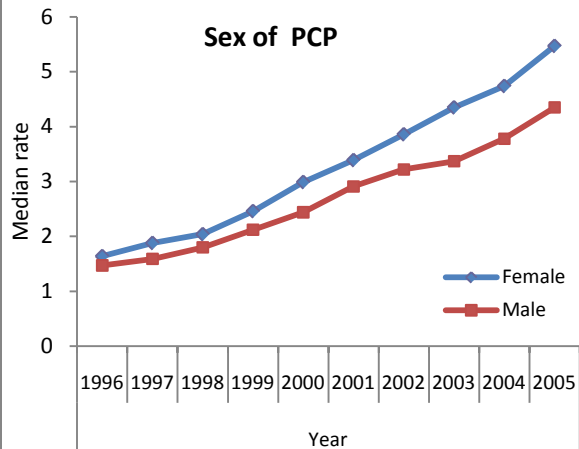

### Years of practice

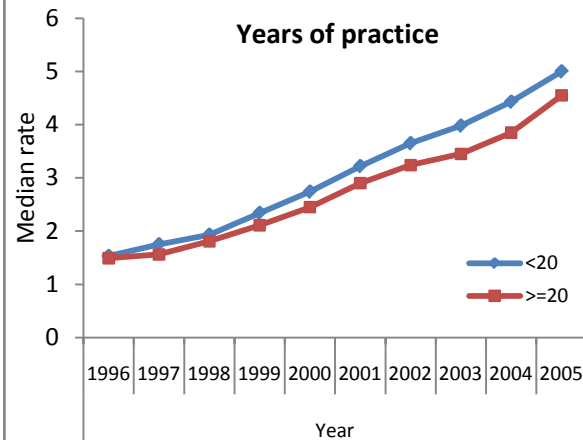

### Location of medical training

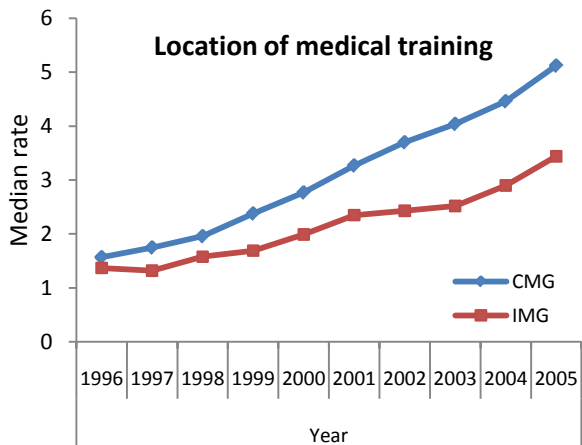

### Rural location of practice

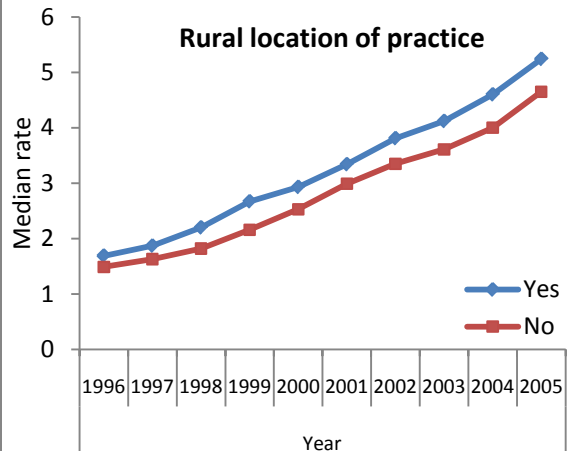

### Number of screen eligible patients in practice

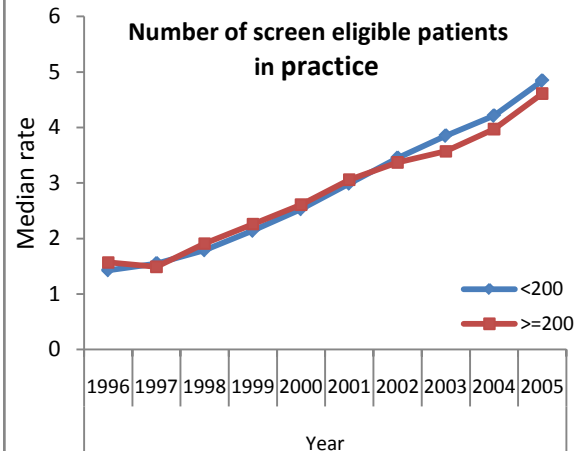

Supplement: MOESM3 [file 9437140]
